# Supplementary material
Source: Springer Nature journal article supplement (https://www.springermedizin.de/resource/supplementary/12955_2003_17_MOESM1_ESM.pdf/9558378)

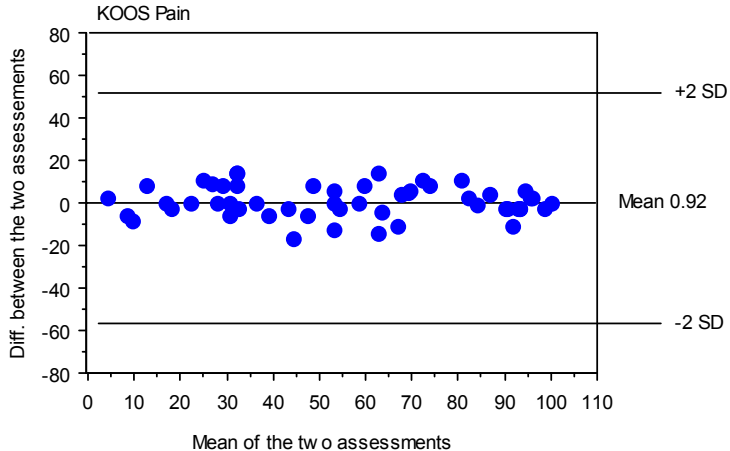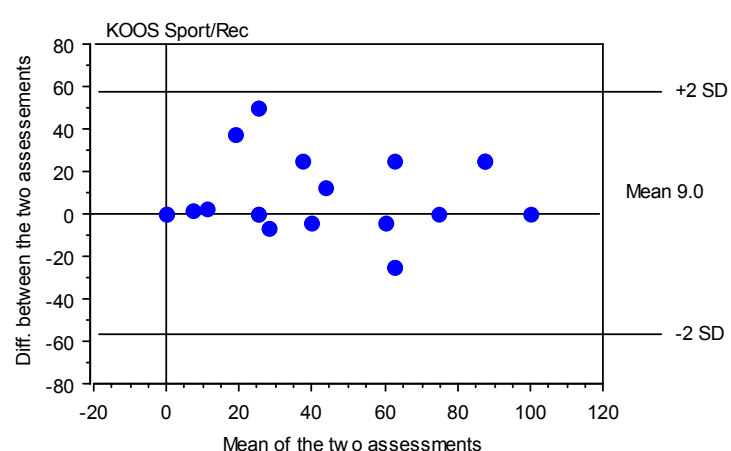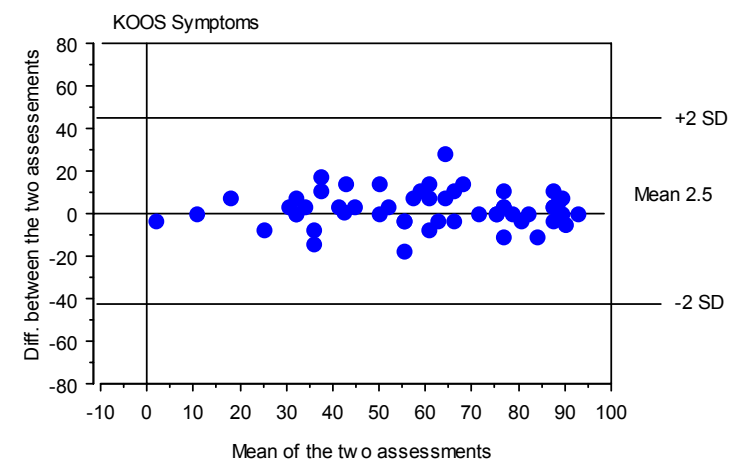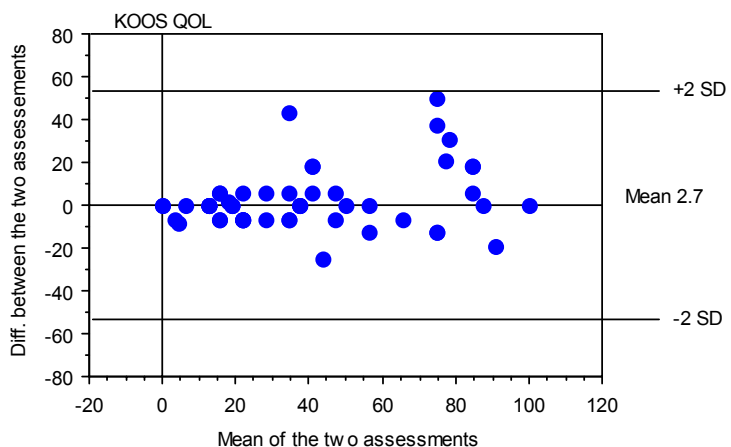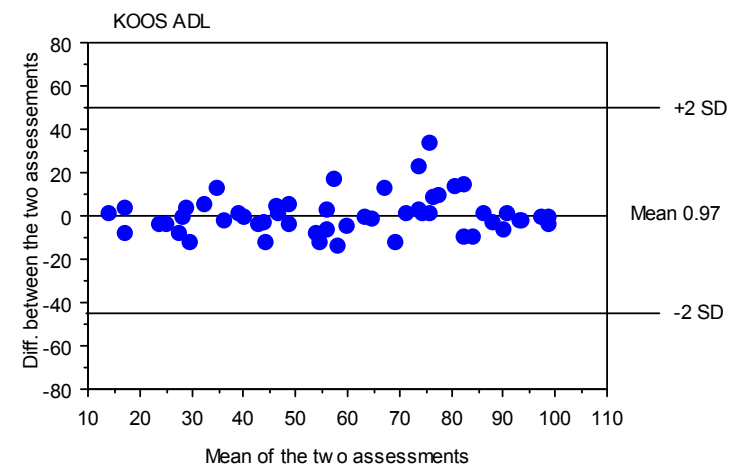

Supplement: MOESM1 [file 9558378]
